# Supplementary material for: Maternal and Neonatal Circulating Markers of Metabolic and Cardiovascular Risk in the Metformin in Gestational Diabetes (MiG) Trial: Responses to maternal metformin versus insulin treatment
Source: PubMed Central journal article supplement — Diabetes Care. 2013 Feb 13;36(3):529–36. doi: 10.2337/dc12-1097 (PMC3579335; doi:10.2337/dc12-1097), 2013-02-13
Supplement: supp_dc12-1097v121097_DC121097SupplementaryData.pdf [file supp_dc12-1097v121097_DC121097SupplementaryData.pdf]

SUPPLEMENTARY DATA

**Supplementary Table 1.** Univariate logistic regression for birthweight over the 90<sup>th</sup> centile with maternal, infant and cord blood .

| Variable                                            | Metformin                  |       | Insulin                    |       |
|-----------------------------------------------------|----------------------------|-------|----------------------------|-------|
|                                                     | Exp(B) (95%CI)             | P     | Exp(B) (95%CI)             | P     |
| <i>Maternal variables at baseline</i>               |                            |       |                            |       |
| Ethnicity (Caucasian vs non-Caucasian, Caucasian=1) | 0.69 (0.35 – 1.35) [236]   | 0.27  | 0.61 (0.29 – 1.27) [242]   | 0.19  |
| Parity (nulliparous vs multiparous) nulliparous = 1 | 0.56 (0.26 – 1.21) [235]   | 0.14  | 0.32 (0.012 – 0.85) [241]  | 0.02  |
| Maternal age (years)                                | 1.02 (0.96 – 1.08) [236]   | 0.59  | 0.97 (0.91 – 1.04) [424]   | 0.43  |
| Smoking in pregnancy (yes=1)                        | 1.80 (0.82 – 3.95) [236]   | 0.14  | 0.71 (0.23 – 2.14) [242]   | 0.54  |
| BMI at baseline (kg/m <sup>2</sup> )                | 1.05 (1.01 – 1.09) [236]   | 0.03  | 1.04 (0.99 – 1.09) [241]   | 0.11  |
| Triglycerides (mmol/L)                              | 1.28 (0.90 – 1.81) [213]   | 0.17  | 1.83 (1.14 – 2.93) [188]   | 0.01  |
| Fasting glucose (mmol/L)                            | 1.31 (0.94 – 1.83) [215]   | 0.11  | 0.99 (0.61 – 1.61) [194]   | 0.96  |
| HbA1c (%)                                           | 1.61 (0.98 – 2.64) [223]   | 0.06  | 2.04 (1.18 – 3.54) [211]   | 0.01  |
| C-Peptide (µg/L)                                    | 1.81 (0.99 – 3032) [64]    | 0.05  | 0.87 (0.29 – 2.65) [61]    | 0.81  |
| LDL cholesterol (mmol/L)                            | 0.84 (0.57 – 1.25) [151]   | 0.40  | 1.99 (0.68 – 1.46) [141]   | 0.98  |
| Cholesterol (mmol/L)                                | 0.87 (0.61 – 1.24) [152]   | 0.43  | 1.11 (0.82 – 1.52) [139]   | 0.50  |
| HDL cholesterol (mmol/L)                            | 1.22 (0.34 – 4.31) [154]   | 0.76  | 0.36 (0.09 – 1.36) [143]   | 0.13  |
| <i>Maternal variables at 36 weeks gestation</i>     |                            |       |                            |       |
| BMI (kg/m <sup>2</sup> )                            | 1.05 (1.00 – 1.09) [203]   | 0.04  | 1.06 (1.00 – 1.12) [221]   | 0.02  |
| Weight gain (kg)                                    | 1.07 (0.94 – 1.20) [203]   | 0.30  | 1.02 (0.92 – 1.14) [221]   | 0.70  |
| Fasting glucose (mmol/L)                            | 1.77 (1.03 – 3.04) [188]   | 0.04  | 2.06 (1.21 – 3.50) [205]   | 0.01  |
| HbA1c (%)                                           | 3.22 (1.57 – 6.61) [196]   | 0.001 | 2.35 (1.31 – 4.24) [210]   | 0.004 |
| Triglycerides (mmol/L)                              | 1.37 (0.98 – 1.92) [168]   | 0.07  | 1.36 (0.86 – 2.15) [188]   | 0.20  |
| C-peptide (µg/L)                                    | 1.57 (0.64 – 3.85) [51]    | 0.33  | 2.57 (0.75 – 8.77) [51]    | 0.13  |
| HDL cholesterol (mmol/L)                            | 0.73 (0.24 – 2.23) [130]   | 0.58  | 0.65 (0.19 – 2.22) [141]   | 0.49  |
| Cholesterol (mmol/L)                                | 0.77 (0.53 – 1.13) [127]   | 0.18  | 1.04 (0.71 – 1.52) [141]   | 0.85  |
| LDL cholesterol (mmol/L)                            | 0.68 (0.43 – 1.09) [125]   | 0.11  | 1.08 (0.69 – 1.70) [139]   | 0.73  |
| <i>Infant and cord blood variables</i>              |                            |       |                            |       |
| Sex (female = 1)                                    | 1.03 (0.52 – 2.02)[236]    | 0.94  | 0.76 (0.37 – 1.6) [242]    | 0.45  |
| Days from baseline to delivery                      | 1.00 (0.97 – 1.00) [236]   | 0.07  | 0.98 (0.96 – 1.00) [242]   | 0.03  |
| Triglycerides (mmol/L)                              | 0.06 (0.005 – 0.65) [220]  | 0.02  | 0.40 (0.06 – 2.89) [233]   | 0.37  |
| Glucose (mmol/L)                                    | 0.96 (0.75 – 1.22) [218]   | 0.72  | 0.77 (0.57 – 1.03) [233]   | 0.08  |
| LDL cholesterol (mmol/L)                            | 0.35 (0.03 – 5.04) [72]    | 0.44  | 4.31( 0.045 – 41.59) [71]  | 0.21  |
| HDL cholesterol (mmol/L)                            | 0.89 (0.12 – 6.82) [72]    | 0.91  | 2.45(0.18 – 33.72) [71]    | 0.51  |
| Leptin (µg/L)                                       | 1.08 (1.02 – 1.15) [44]    | 0.01  | 1.09 (1.02 – 1.16) [43]    | 0.01  |
| C-peptide (µg/L)                                    | 28.24 (1.00 – 799.20) [31] | 0.05  | 16.81 (1.15 – 253.34) [30] | 0.04  |

SUPPLEMENTARY DATA

**Supplementary Table 2.** Univariate logistic regression for birthweight less than the 10<sup>th</sup> centile with maternal, infant and cord blood variables.

| Variable                                            | Metformin                   |       | Insulin                   |      |
|-----------------------------------------------------|-----------------------------|-------|---------------------------|------|
|                                                     | Exp(B) (95%CI) [n]          | P     | Exp(B) (95%CI)            | P    |
| <i>Maternal variables at baseline</i>               |                             |       |                           |      |
| Ethnicity (Caucasian vs non-Caucasian, Caucasian=1) | 0.84 (0.36 – 1.99 ) [236]   | 0.70  | 0.41 (0.18 – 0.92) [242]  | 0.03 |
| Parity (nulliparous vs multiparous) nulliparous = 1 | 0.88 (0.34 – 2.25) [235]    | 0.78  | 1.44 (0.66 – 3.14) [241]  | 0.36 |
| Maternal age (years)                                | 1.03 (0.95 – 1.12) [236]    | 0.49  | 1.06 (0.98 – 1.14) [242]  | 0.14 |
| Smoking in pregnancy (yes=1)                        | 0.92 (0.86 – 0.99) [236]    | 0.02  | 0.96 (0.91 – 1.02) [241]  | 0.20 |
| BMI at baseline (kg/m <sup>2</sup> )                | 1.24 (0.43 – 3.54) [236]    | 0.69  | 1.12 (0.40 – 3.13) [242]  | 0.83 |
| Triglycerides (mmol/L)                              | 0.90 (0.56 – 1.46) [213]    | 0.68  | 0.59 (0.32 – 1.11) [188]  | 0.10 |
| Fasting glucose (mmol/L)                            | 0.82 (0.50 – 1.35) [215]    | 0.44  | 0.96 (0.59 – 1.55) [194]  | 0.86 |
| HbA1c (%)                                           | 0.59 (0.27 – 1.31) [223]    | 0.20  | 1.45 (0.83 – 2.54) [211]  | 0.20 |
| C-Peptide (µg/L)                                    | 0.38 (0.12 – 1.16) [64]     | 0.09  | 1.93 (0.59 – 6.29) [61]   | 0.27 |
| LDL cholesterol (mmol/L)                            | 1.04 (0.75 – 1.45) [151]    | 0.82  | 0.61 (0.37 – 0.99) [141]  | 0.04 |
| Cholesterol (mmol/L)                                | 1.05 (0.77 – 1.44) [152]    | 0.74  | 0.74 (0.51 – 1.06) [139]  | 0.10 |
| HDL cholesterol (mmol/L)                            | 1.35 (0.39 – 4.64) [154]    | 0.63  | 2.61 (0.81 – 8.39) [143]  | 0.11 |
| <i>Maternal variables at 36 weeks gestation</i>     |                             |       |                           |      |
| BMI (kg/m <sup>2</sup> )                            | 0.91 (0.85 – 0.99) [203]    | 0.02  | 0.96 (0.90 – 1.02) [221]  | 0.16 |
| Weight gain (kg)                                    | 0.94 (0.79 – 1.11) [203]    | 0.46  | 1.07 (0.97 – 1.19) [221]  | 0.19 |
| Fasting glucose (mmol/L)                            | 0.77 (0.36 – 1.64) [188]    | 0.50  | 0.90 (0.50 – 1.62) [205]  | 0.73 |
| HbA1c (%)                                           | 0.40 (0.16 – 1.01) [196]    | 0.05  | 1.04 (0.57 – 1.89) [210]  | 0.90 |
| Triglycerides (mmol/L)                              | 0.52 (0.27 – 1.00) [168]    | 0.05  | 0.67 (0.39 – 1.17) [188]  | 0.16 |
| C-peptide (µg/L)                                    | 0.15 (0.023 – 1.29)[51]     | 0.08  | 4.51 (0.56 – 36.32) [51]  | 0.16 |
| HDL cholesterol (mmol/L)                            | 1.02 (0.29 – 3.58) [130]    | 0.97  | 5.66 (1.61 – 19.93) [141] | 0.01 |
| Cholesterol (mmol/L)                                | 0.97 (0.72 – 1.32) [127]    | 0.85  | 0.82 (0.51 – 1.30) [141]  | 0.40 |
| LDL cholesterol (mmol/L)                            | 1.00 (0.74 – 1.34) [125]    | 0.98  | 0.61 (0.34 – 1.11) [139]  | 0.11 |
| <i>Infant and cord blood variables</i>              |                             |       |                           |      |
| Sex (female = 1)                                    | 1.10 (0.46 – 2.59) [236]    | 0.83  | 0.85 (0.40 – 1.81) [242]  | 0.67 |
| Days from baseline to delivery                      | 1.01 (0.99 – 1.02) [236]    | 0.48  | 1.02 (1.00 – 1.03)[242]   | 0.05 |
| Triglycerides (mmol/L)                              | 16.17 (2.55 – 102.51) [220] | 0.003 | 4.50 (1.02 – 19.92) [233] | 0.05 |
| Glucose (mmol/L)                                    | 1.13 (0.84 – 1.52) [218]    | 0.42  | 1.27 (1.01 – 1.60) [233]  | 0.04 |
| LDL cholesterol (mmol/L)                            | 1.22 (0.10 – 15.51) [72]    | 0.88  | 0.06 (0 - 19.81) [71]     | 0.35 |
| HDL cholesterol (mmol/L)                            | 1.25 (0.10 – 15.39) [72]    | 0.86  | 0.08 (0 – 7.20) [71]      | 0.28 |
| Leptin (µg/L)                                       | 0.85 (0.70 – 1.02) [44]     | 0.08  | 0.91 (0.84 – 1.00) [43]   | 3.95 |
| C-peptide (µg/L)                                    | 0.05 (0 – 2.78) [31]        | 0.14  | 0.03 (0 – 107.72) [31]    | 0.41 |

SUPPLEMENTARY DATA

**Supplementary Table 3.** Univariate logistic regression for birthweight less than the 10<sup>th</sup> centile with maternal, infant and cord blood variables. All adjusted for maternal age, ethnicity, parity, maternal smoking, infant sex, time from baseline to delivery and maternal BMI at baseline\*

| Variable                                               | Metformin                   |       | Insulin                   |      |
|--------------------------------------------------------|-----------------------------|-------|---------------------------|------|
|                                                        | Exp(B) (95%CI) [n]          | P     | Exp(B) (95%CI) [n]        | P    |
| <i>Maternal plasma variables at baseline</i>           |                             |       |                           |      |
| C-peptide (µg/L)                                       | 0.22 (0.04 – 1.20) [64]     | 0.08  | 4.01 (0.41 – 39.13) [61]  | 0.23 |
| HbA1c (%)                                              | 0.50 (0.20 – 1.23) [223]    | 0.13  | 1.34 (0.69 – 2.59) [210]  | 0.40 |
| Triglycerides (mmol/L)                                 | 0.89 (0.55 – 1.43) [213]    | 0.63  | 0.56 (0.29 – 1.09) [187]  | 0.09 |
| Fasting glucose (mmol/L)                               | 0.84 (0.52 – 1.37) [215]    | 0.49  | 0.94 (0.54 – 1.61) [193]  | 0.81 |
| HDL cholesterol (mmol/L)                               | 0.99 (0.27 – 3.70)[154]     | 0.99  | 1.55 (0.40 – 6.06) [143]  | 0.53 |
| LDL cholesterol (mmol/L)                               | 1.18(0.80 – 1.75)[151]      | 0.41  | 0.80 (0.46 – 1.38) [141]  | 0.42 |
| Cholesterol (mmol/L)                                   | 1.17 (0.81 – 1.68) [152]    | 0.41  | 0.85 (0.56 – 1.31) [139]  | 0.47 |
| <i>Maternal plasma variables at 36 weeks gestation</i> |                             |       |                           |      |
| Fasting glucose (mmol/L)                               | 0.99 (0.45 – 2.22) [187]    | 0.99  | 0.93 (0.50 – 1.74) [204]  | 0.82 |
| HbA1c (%)                                              | 0.41 (0.15 – 1.15) [195]    | 0.09  | 0.79 (0.38 – 1.63) [209]  | 0.53 |
| Triglycerides (mmol/L)                                 | 0.53 (0.28 – 1.01) [167]    | 0.06  | 0.60 (0.33 – 1.09) [187]  | 0.09 |
| HDL cholesterol (mmol/L)                               | 0.72 (0.19 – 2.81) [130]    | 0.64  | 4.38 (0.97 – 19.92) [141] | 0.06 |
| Cholesterol (mmol/L)                                   | 0.99 (0.72 – 1.35) [127]    | 0.93  | 1.06 (0.62 – 1.80) [141]  | 0.84 |
| LDL cholesterol (mmol/L)                               | 1.1 (0.74 – 1.38) [125]     | 0.94  | 0.92 (0.47 – 1.83) [139]  | 0.82 |
| <i>Cord plasma variables</i>                           |                             |       |                           |      |
| Triglycerides (mmol/L)                                 | 27.61 (2.97 – 256.98) [219] | 0.004 | 8.53 (1.55 – 46.84) [231] | 0.01 |
| Glucose (mmol/L)                                       | 1.04 (0.75 – 1.45) [217]    | 0.80  | 1.29 (1.00 – 1.66) [231]  | 0.05 |
| LDL cholesterol (mmol/L)                               | 1.47 (0.07 – 28.90) [72]    | 0.80  | 0.04 (0 – 65.92) [71]     | 0.39 |
| HDL cholesterol (mmol/L)                               | 0.73 (0.04 – 11.91) [72]    | 0.82  | 0 (0 – 7.00) [71]         | 0.10 |
| Leptin (µg/L)                                          | 0.65 (0.42 – 1.00) [44]     | 0.05  | 0.92 (0.83 – 1.03) [43]   | 0.15 |

\* C-peptide at 36 weeks and in cord plasma were not able to be analyzed due to small numbers
